# Supplementary material for: Cardioprotective Effect of Glycyrrhizin on Myocardial Remodeling in Diabetic Rats
Source: MDPI journal article supplement (doi:10.3390/biom11040569), 2021-04-13
Supplement: s1 [file s1]

## Supplementary Materials:

Suppl. Fig. 1

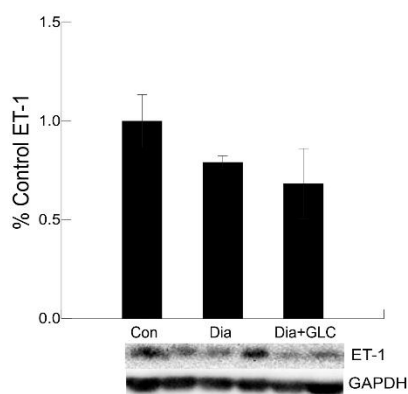

**Suppl. Fig. 1.** No significant change in endothelin 1 expression in diabetic heart tissues as well as its expression in the GLC-treated animals.

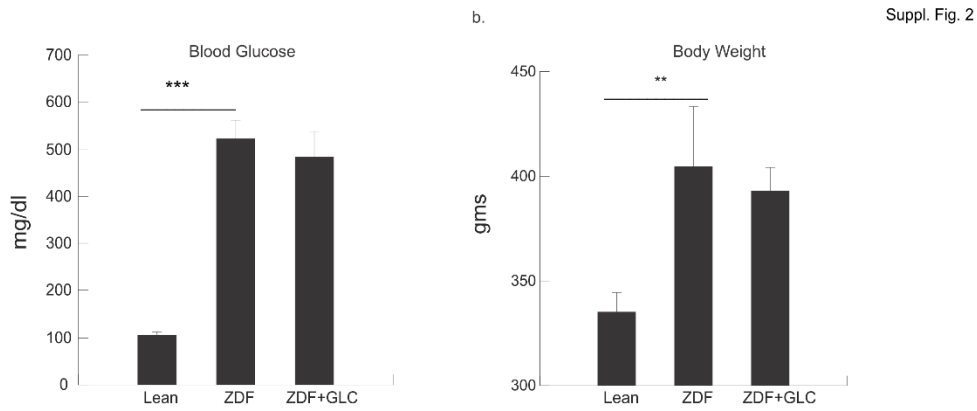

Original supplemental figure from <https://doi.org/10.3390/ijms21030881>

**Suppl. Fig. 2.** No significant change in blood glucose levels and body weight in diabetic GLC-treated animals as shown earlier (Fig S4; <https://doi.org/10.3390/ijms21030881>).

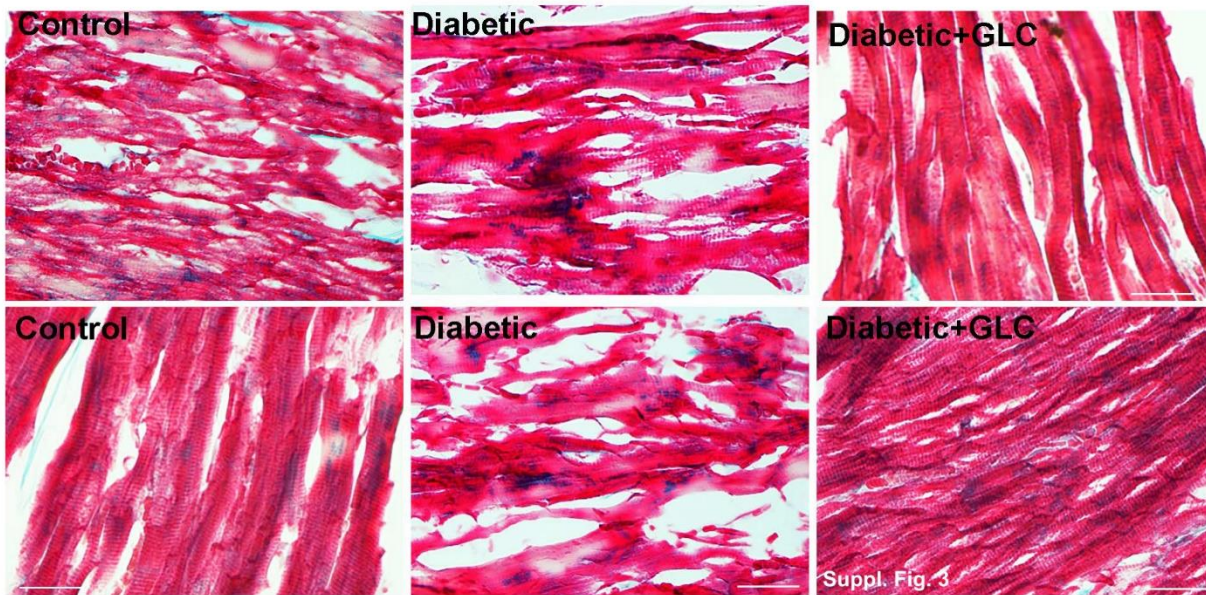

**Suppl. Fig. 3.** Images showing changes in collagen deposition (in blue) in ZDF type 2 diabetic, diabetic with GLC treatment and lean control rats.
